# Supplementary material
Source: PubMed Central journal article supplement (PMC2662216)
Supplement: M802537200_1.pdf [file M802537200_1.pdf]

### **Supplemental Data**

**Figure 1. AMPK activation increased phosphorylation of GSK3 $\beta$  with DB-cAMP in primary hepatocytes.** Primary hepatocytes were isolated from male C57B6 mice by the collagenase method. Hepatocytes were treated with AICAR (2mM) or the selective AMPK inhibitor Compound C (20  $\mu$ M) with or without DB-cAMP(0.5mM). Immunoblot analyses were performed with HepG2 cell extracts prepared using anti-phospho-ACC (Ser-79), anti-TORC2, anti-phospho-GSK3 $\beta$  (Ser-9), anti-GSK3 $\beta$ , anti-phospho-CREB (Ser-129) or anti-CREB antibody, as indicated.

Supplemental Data  
figure1

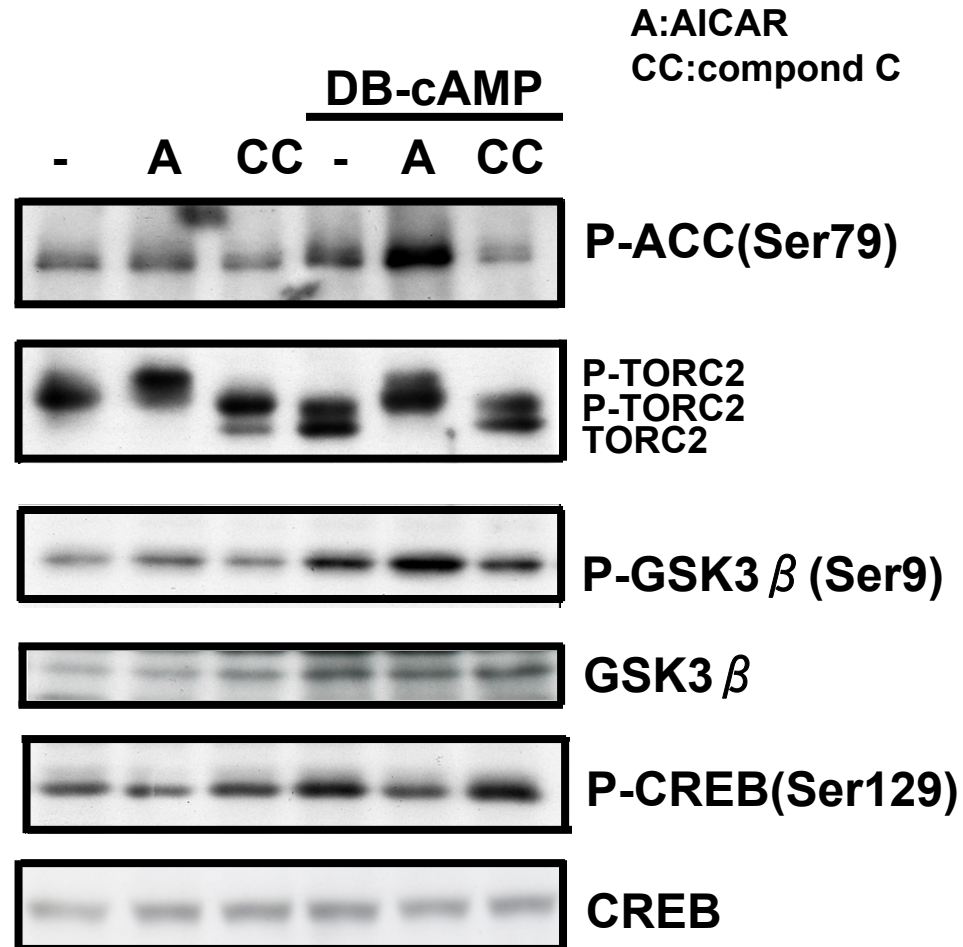

*Primary hepatocytes*
